# Supplementary material for: The Value Experience of Intrathecal Pump Implantation for Cancer Pain Patients: A Qualitative Study Focusing on Family Caregivers
Source: Research Square preprint supplement (doi:10.21203/rs.3.rs-8497612/v1), 2026-02-02
Supplement: Supplementary file 1 [file 40846e54b44a560a506348ac.docx]

**Semi-Structured Interview Guide for Family Caregivers: Focusing on the Value and Experience of Intrathecal Analgesic Pump Implantation**

Core Theme: Exploring Family Caregivers' Experiences and Perceptions of the Value of Epidural Pain Pump Implantation

Opening Introduction:

“Thank you for participating in this interview. We'd like to understand your experiences and perspectives as a family member accompanying the patient through the decision-making process and acceptance of epidural pain pump implantation. Please feel free to share your story—there are no right or wrong answers. Our conversation will last approximately 40–50 minutes.”

Interview Outline:

**1. Regarding Expectations and Decision-Making Context**

(1) What pain management outcomes did you expect for the patient after intrathecal analgesic pump implantation?

(2) What are your expectations regarding changes in the patient's condition after intrathecal pump implantation?

(3) What was your understanding of intrathecal pump implantation prior to surgery?

**2. On Experiencing Value and Change**

(4) What value did you perceive the intrathecal analgesic pump bring to the patient and yourself after implantation?

**3. On Perceived Necessity and Timing**

(5) Under what circumstances would you be willing to consent to a patient receiving an intrathecal analgesia pump?

(6) At what stage of the patient's condition do you believe intrathecal analgesia pump implantation becomes necessary?

**4. Regarding Care Practices and Support Needs**

(7) What specific care needs do you anticipate requiring after the patient receives the intrathecal analgesia pump?

**Closing：**

“Thank you so much for sharing your valuable time and profound experiences. Your insights are crucial to our study. The next steps involve analyzing the data. Would you like to receive a summary of the study findings once completed?”
